# Supplementary material
Source: PubMed Central journal article supplement (PMC4467859)
Supplement: embr0016-0753-sd2.pdf [file embr0016-0753-sd2.pdf]

## Expanded View Figures

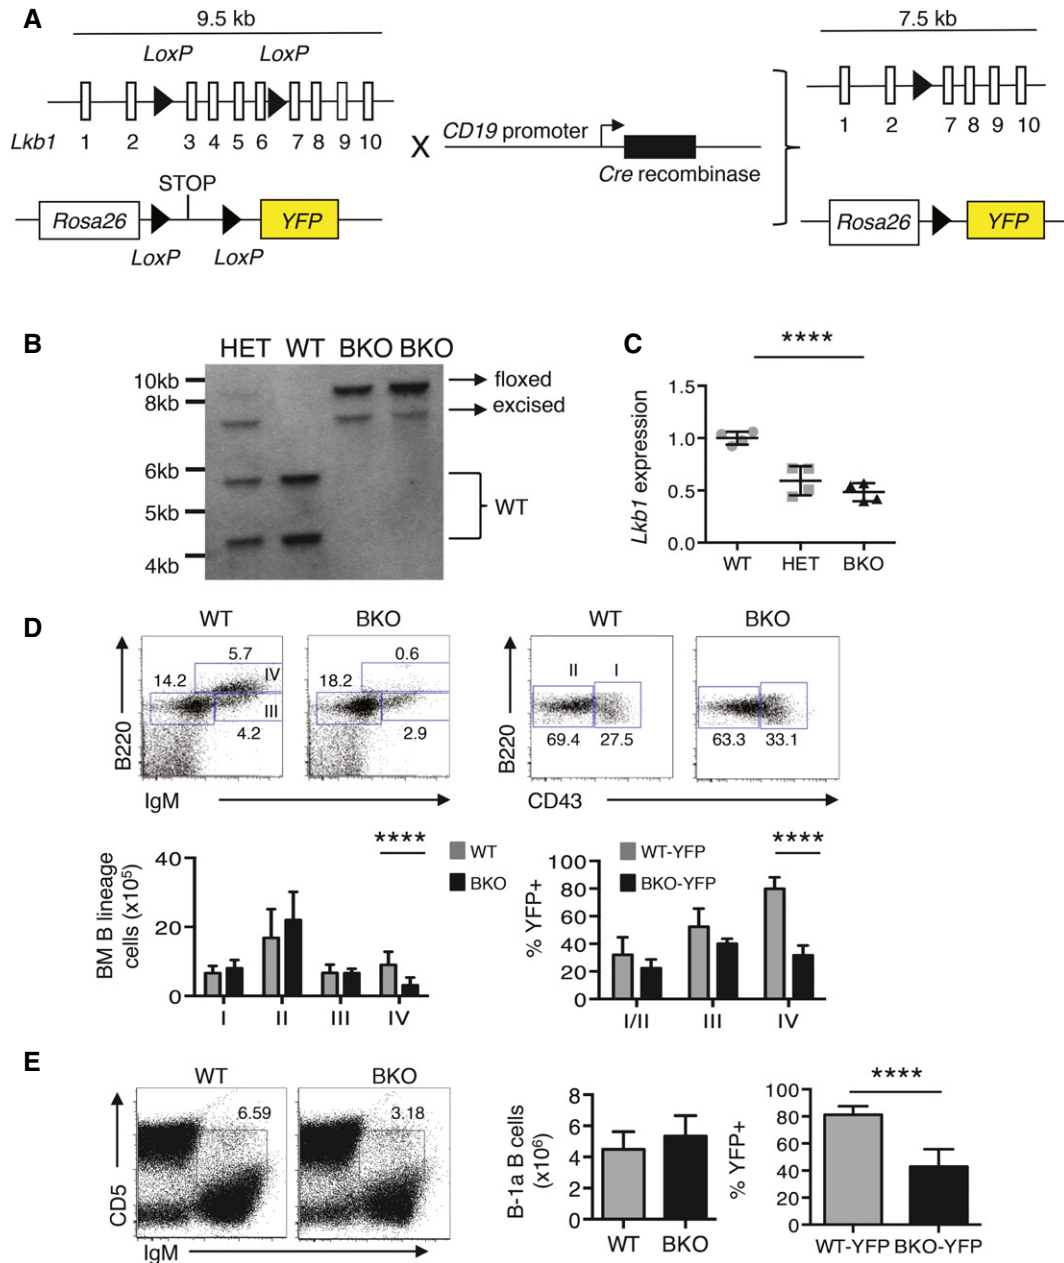

**Figure EV1. Decreased recirculating B cells in the BM of BKO mice.**

A Strategy for generating *Lkb1* B-cell lineage-specific knockout (BKO, BKO-YFP) mice.

B Southern blot of CD43-depleted splenocytes (> 85% B cells) from HET, WT, and BKO mice evaluating excision of *Lkb1* exons 3–6.

C *Lkb1* expression, relative to *36b4*, by qRT-PCR of CD43-depleted splenocytes from WT ( $n = 4$ ), HET ( $n = 4$ ), and BKO ( $n = 4$ ) mice. Mean  $\pm$  s.d., \*\*\*\* $P = 0.0001$  by two-tailed, unpaired Student's  $t$ -test.

D Flow cytometry showing pro-B (I), pre-B (II), immature B (III), and recirculating B (IV) cells in the BM of WT ( $n = 9$ ) and BKO ( $n = 10$ ) mice and the frequency of YFP<sup>+</sup> B cells in each subpopulation ( $n = 5$ ). Mean  $\pm$  s.d., \*\*\*\* $P = 0.0004$  by Mann-Whitney  $U$ -test (left) and \*\*\*\* $P = 8.8E-006$  by two-tailed, unpaired Student's  $t$ -test (right), respectively.

E Flow cytometry showing splenic B-1a cells in WT ( $n = 6$ ) and BKO ( $n = 9$ ) mice and the frequency of YFP<sup>+</sup> B-1a cells ( $n = 9$  and 8, respectively). Mean  $\pm$  s.d., \*\*\*\* $P = 1.8E-05$  by two-tailed, unpaired Student's  $t$ -test.

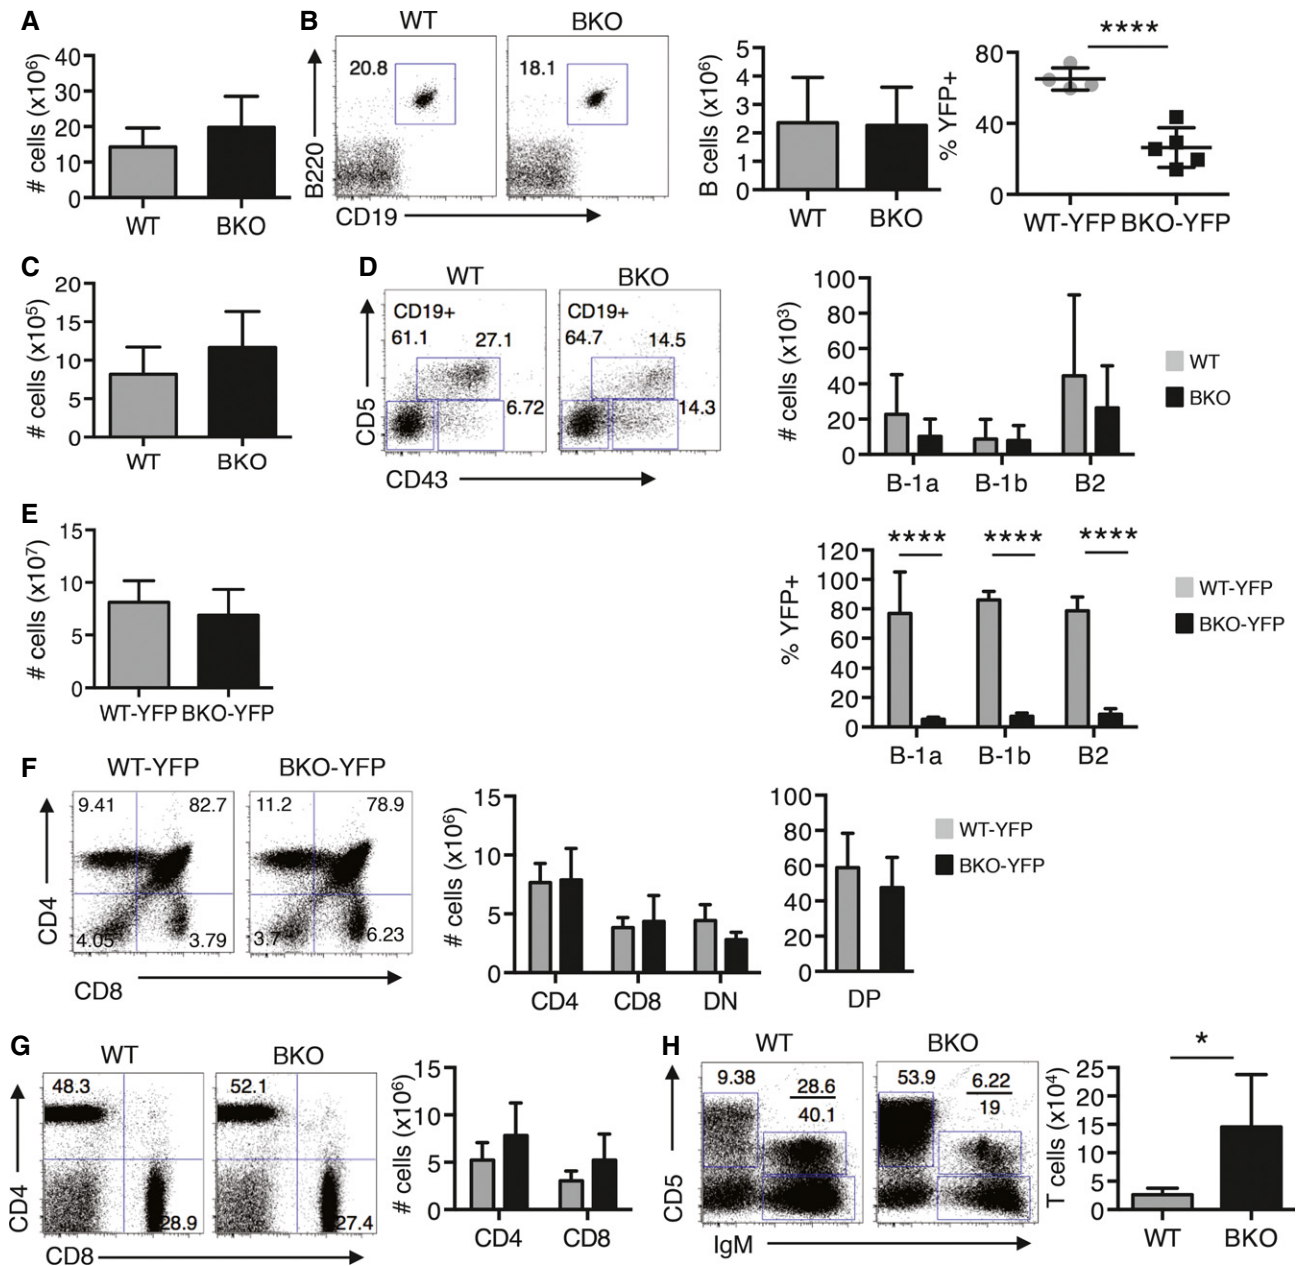

**Figure EV2. Reduced LKB1<sup>-</sup> B cells in lymphoid tissues, but increased T cells in the peritoneum of BKO mice.**

A Lymph node cellularity in WT ( $n = 7$ ) and BKO ( $n = 10$ ) mice.

B Left and center panels: Flow cytometry of B220<sup>+</sup>CD19<sup>+</sup> B cells in lymph nodes of WT ( $n = 7$ ) and BKO ( $n = 10$ ) mice. Right panel: Flow cytometry for YFP<sup>+</sup> expression in B220<sup>+</sup>CD19<sup>+</sup> B cells in lymph nodes of WT-YFP ( $n = 4$ ) and BKO-YFP ( $n = 5$ ) mice. \*\*\*\* $P = 0.0005$  by two-tailed, unpaired Student's  $t$ -test.

C Peritoneal cavity cellularity in WT ( $n = 5$ ) and BKO ( $n = 5$ ) mice.

D Upper panels: Flow cytometry of B cells in the peritoneal cavity of WT ( $n = 5$ ) and BKO ( $n = 5$ ) mice. Lower panel: Frequency of YFP<sup>+</sup> cells in total B-1a, B-1b, and B2 B-cell subsets in the peritoneal cavity of WT-YFP ( $n = 8$ ) and BKO-YFP ( $n = 8$ ) mice. \*\*\*\* $P = 0.0002$ ,  $9.8E-012$ , and  $6.7E-009$ , respectively, by two-tailed, unpaired Student's  $t$ -test.

E Thymus cellularity in WT-YFP ( $n = 5$ ) and BKO-YFP ( $n = 5$ ) mice.

F Flow cytometry for CD4<sup>+</sup> and CD8<sup>+</sup> expression in thymocytes of WT-YFP ( $n = 5$ ) and BKO-YFP ( $n = 5$ ) mice.

G Flow cytometry for CD4<sup>+</sup> and CD8<sup>+</sup> T cells in lymph nodes from WT ( $n = 7$ ) and BKO ( $n = 10$ ) mice.

H Flow cytometry for CD5<sup>+</sup> T cells in the peritoneum of WT ( $n = 5$ ) and BKO ( $n = 5$ ) mice. \* $P = 0.016$  by two-tailed, unpaired Student's  $t$ -test.

Data information: Mean  $\pm$  s.d.

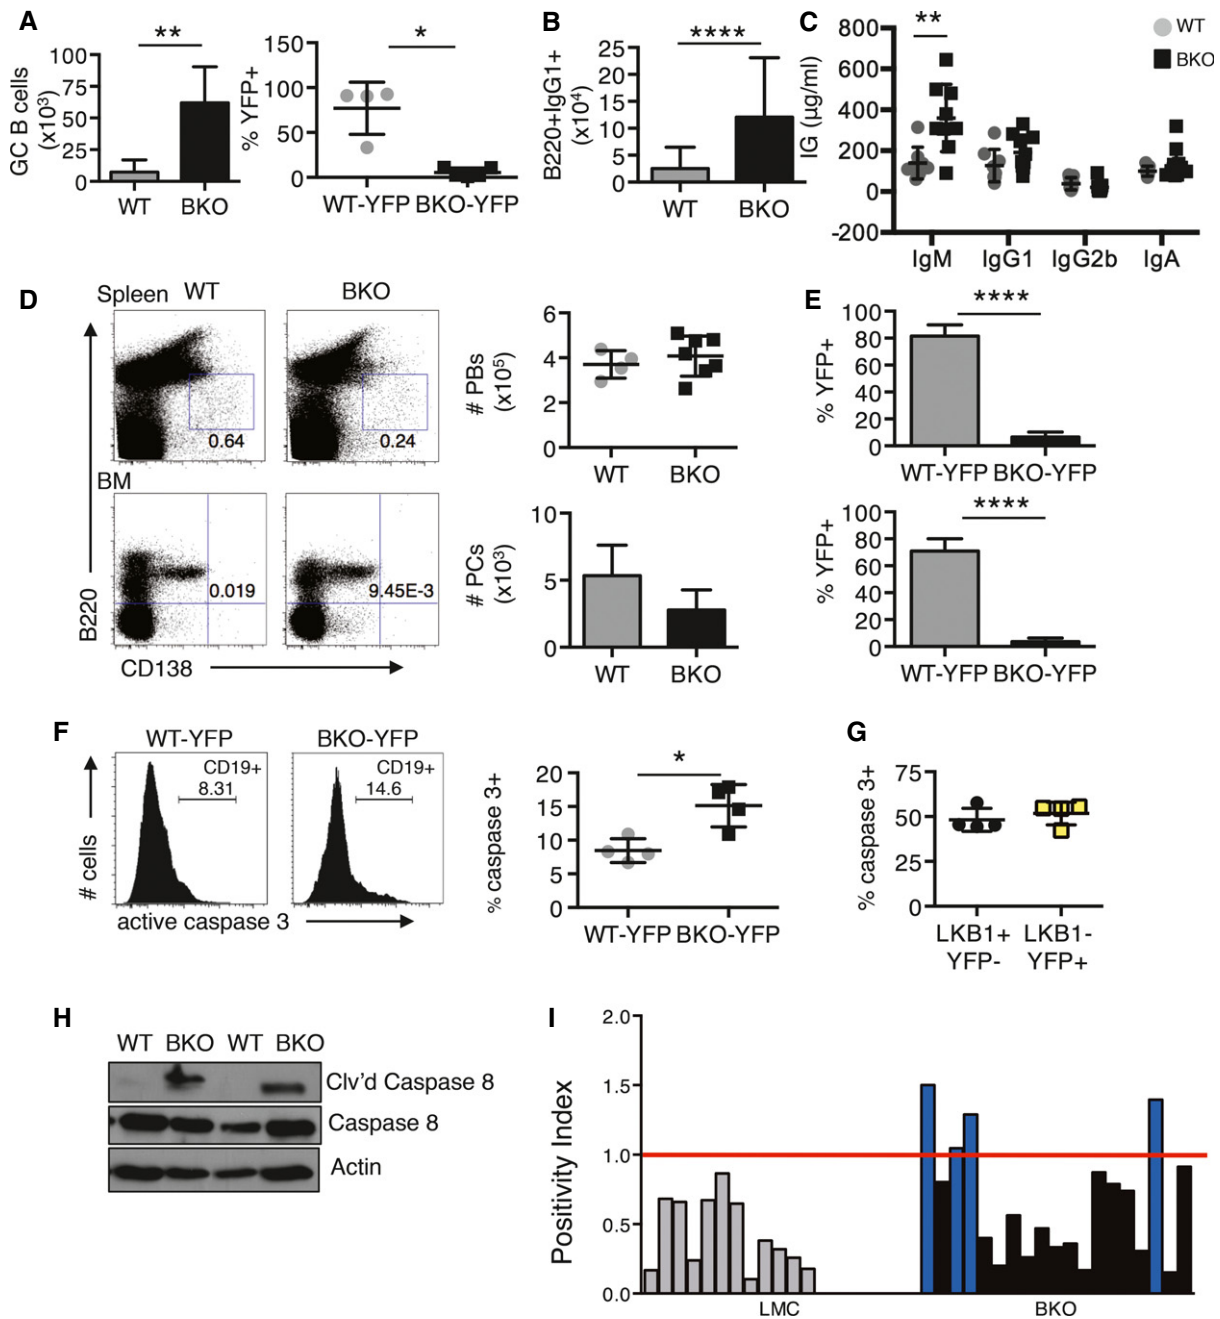

**Figure EV3. BKO mice contain abundant isotype-switched and apoptotic GC B cells.**

- A Number of B220<sup>+</sup>GL7<sup>+</sup>FAS<sup>+</sup> GC B cells from WT (*n* = 5) and BKO (*n* = 8) lymph nodes and the frequency of YFP<sup>+</sup> GC B cells from WT-YFP (*n* = 4) and BKO-YFP (*n* = 5) lymph nodes. \*\**P* = 0.006 by Mann–Whitney *U*-test and \**P* = 0.015 by two-tailed, unpaired Student's *t*-test.
- B Number of B220<sup>+</sup>IgG1<sup>+</sup> B cells from WT (*n* = 5) and BKO (*n* = 9) lymph nodes. \*\*\*\**P* = 0.0004 by Mann–Whitney *U*-test.
- C Serum Ig isotypes from un-immunized WT (*n* = 7) and BKO (*n* = 10) mice. \*\**P* = 0.01 by two-tailed, unpaired Student's *t*-test.
- D Flow cytometry and number of B220<sup>low</sup>CD138<sup>+</sup> plasmablasts (*n* = 4 and 7, respectively) and B220<sup>−</sup>CD138<sup>+</sup> plasma cells (*n* = 5 and 5, respectively) from the spleen and BM of WT and BKO mice.
- E Percentage of YFP<sup>+</sup> to total plasmablasts (*n* = 8) (top) and plasma cells (*n* = 5) (bottom) from the spleen and BM of WT and BKO mice. \*\*\*\**P* = 2.4E-05 and 2.7E-05, respectively, by two-tailed, unpaired Student's *t*-test.
- F Flow cytometry and percentage of CD19<sup>+</sup> B cells with cleaved caspase 3 expression from spleens of WT-YFP (*n* = 4) and BKO-YFP (*n* = 4) mice. \**P* = 0.016 by two-tailed, unpaired Student's *t*-test.
- G Percentage of cleaved caspase 3<sup>+</sup> CD19<sup>+</sup>YFP<sup>+</sup> and CD19<sup>+</sup>YFP<sup>−</sup> B cells in spleens of BKO (*n* = 4) mice.
- H Representative Western blot analysis of CD43-depleted splenic B cells from WT and BKO mice for presence of cleaved caspase 8.
- I Anti-nuclear antibodies from the serum of WT or HET littermate controls (LMC) (*n* = 12) and BKO (*n* = 19) mice; blue bars represent animals scoring positive for ANAs.
- Data information: (A–G) Mean ± s.d.

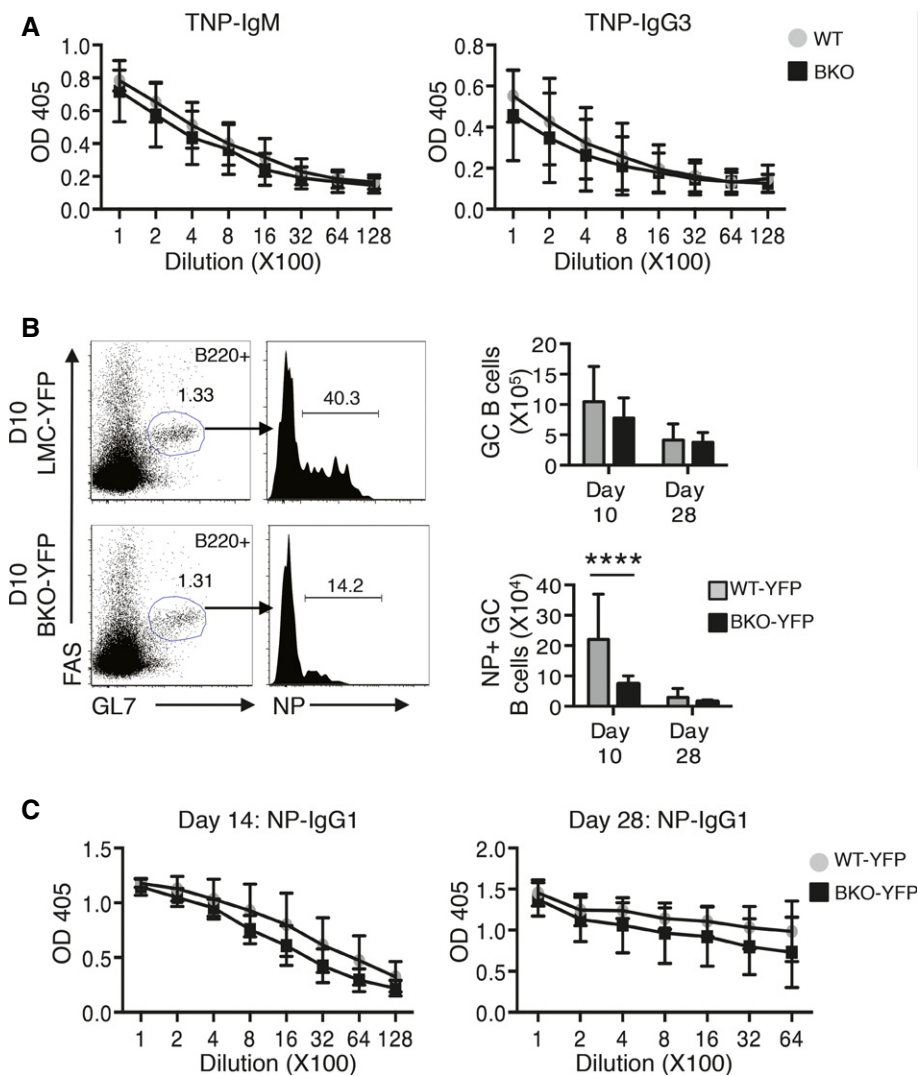

**Figure EV4. BKO mice respond to T-cell-independent and T-cell-dependent antigens.**

A  $\alpha$ TNP-IgM and IgG3 serum responses by ELISA to TNP-AECM-FICOLL 7 days after immunization of WT ( $n = 8$ ) and BKO ( $n = 8$ ) mice.

B Representative flow cytometry for B220, GL7, FAS, and NP expression in splenocytes on day 10 post-immunization from WT-YFP and BKO-YFP mice. Number of total GC and NP-specific GC B cells in response to NP-CGG 10 ( $n = 8$  and 8) and 28 days ( $n = 7$  and 7) after immunization of WT-YFP and BKO-YFP mice. \*\*\*\* $P = 0.0003$  by Mann-Whitney  $U$ -test.

C  $\alpha$ NP-IgG1 serum response by ELISA to NP-CGG 14 ( $n = 4$  and 4) and 28 days ( $n = 6$  and 6) after immunization of WT-YFP and BKO-YFP mice.

Data information: Mean  $\pm$  s.d.

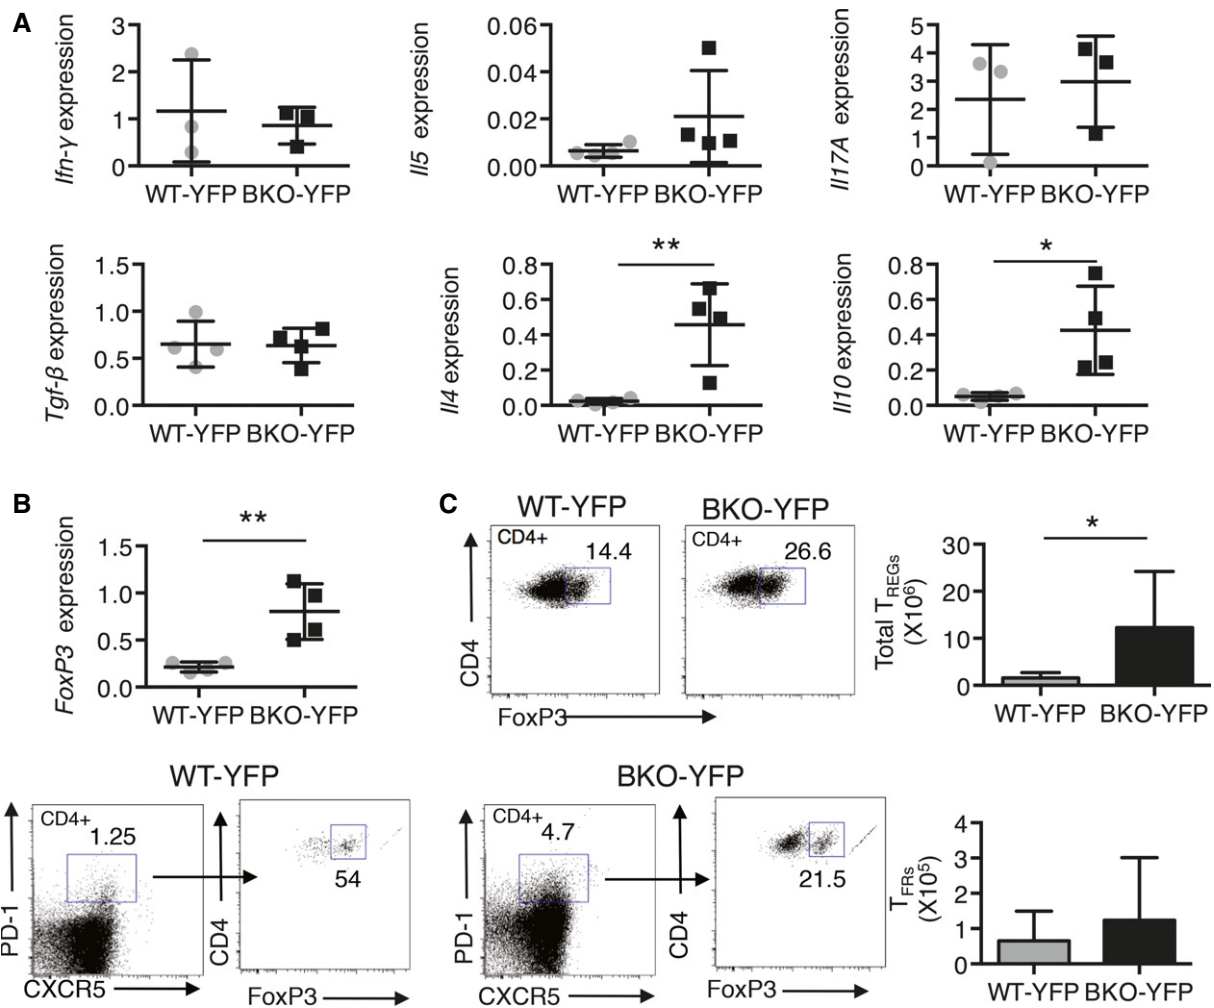

**Figure EV5. Activated T cells from BKO spleens are made up of T<sub>FH</sub> and T<sub>regs</sub>.**

A qRT-PCR for *Ifn-γ*, *Il4*, *Il5*, *Il17A*, *Tgf-β*, and *Il10* expression, relative to *36b4* expression, in splenic CD4<sup>+</sup> T cells from WT-YFP (*n* = 4) and BKO-YFP (*n* = 4) mice.

\*\**P* = 0.01 and \**P* = 0.02 by two-tailed, unpaired Student's *t*-test.

B qRT-PCR for *FoxP3* expression, relative to *36b4* expression, in splenic CD4<sup>+</sup> T cells from WT-YFP (*n* = 4) and BKO-YFP (*n* = 4) mice. \*\**P* = 0.008, two-tailed, unpaired Student's *t*-test.

C Flow cytometry analysis for CD4<sup>+</sup>FoxP3<sup>+</sup> T<sub>REG</sub> and T<sub>FR</sub> effector cell populations in WT-YFP (*n* = 6) and BKO-YFP (*n* = 6) mice. \**P* = 0.04 by Mann-Whitney *U*-test.

Data information: Mean ± s.d.
